# Supplementary material for: Patients with Advanced or Metastasised Non-Small-Cell Lung Cancer with Viscum album L. Therapy in Addition to PD-1/PD-L1 Blockade: A Real-World Data Study
Source: MDPI journal article supplement (doi:10.3390/cancers16081609), 2024-04-22
Supplement: s1 [file s1]

**Supplementary table S1. Molecular characteristics of EGFR mutations, n=13**

|                                                        | Total group<br>(n=415) | CRTL<br>(n=222)     | COMB<br>(n=193)     | p-value |
|--------------------------------------------------------|------------------------|---------------------|---------------------|---------|
| <b>EGFR mutation</b>                                   |                        |                     |                     |         |
| p.Leu747_Thr751delLeuArgGluAlaThrinsPro*, n (%)        | 1 (0.2)                | -                   | 1 (0.5) ins, del    | -       |
| p.Leu747_Pro753delinsSer*, n (%)                       | 1 (0.2)                | -                   | 1 (0.5) ins, del    | -       |
| p.Asn771_Asn771delAsninsGlyThr**, n (%)                | 1 (0.2)                | 1 (0.5) del         | -                   | -       |
| p.Glu746_Ala750delGluLeuAr <sup>1</sup> , n (%)        | 1 (0.2)                | 1 (0.5) del, sens   | -                   | -       |
| p.Glu746_Ala750delGluLeuArgGluAla <sup>1</sup> , n (%) | 1 (0.2)                | -                   | 1 (0.5) del, sens   | -       |
| p.Leu858Arg <sup>1</sup> , n (%)                       | 6 (1.4)                | 3 (1.4) point, sens | 3 (1.6) point, sens | 0.86    |
| p.HisdupHis*, n (%)                                    | 1 (0.2)                | 1 (0.5) dupl        | -                   | -       |
| p.Ser768_Asp770dupSerValAsp**, n (%)                   | 1 (0.2)                | -                   | 1 (0.5) dup         | -       |
| Total, n (%)                                           | 13 (3.1)               | 6 (2.7)             | 7 (3.6)             | 0.50    |
| EGFR insertion mutations, n (%)                        | 2 (0.5)                | -                   | 2 (1.0)             | -       |
| EGFR deletion mutations, n (%)                         | 5 (1.2)                | 2 (0.9)             | 3 (1.6)             | 0.54    |
| EGFR point mutations, n (%)                            | 6 (1.4)                | 3 (1.4)             | 3 (1.6)             | 0.86    |
| EGFR duplication mutation, n (%)                       | 2 (0.5)                | 1 (0.5)             | 1 (0.5)             | 0.92    |
| EGFR Mutation sensitive against TKI, n (%)             | 8 (1.9)                | 4 (1.8)             | 4 (2.1)             | 0.84    |

Molecular characteristics and types of EGFR-mutations; ins, insertion mutation; del, deletion mutation; point, point mutation; dupl, duplication mutation; sens, sensitive against tyrosine kinase inhibitors; TKIs, tyrosine kinase inhibitors; \*no sensitivity against TKIs; \*\*no sensitivity against TKIs of 1<sup>st</sup>, 2<sup>nd</sup> or 3<sup>rd</sup> generation; \*\*\*no information on TKI-sensitivity; <sup>1</sup> sensitive against TKI

**Supplementary table S2. Multivariate cox proportional analysis in advanced or metastasized NSCLC patients treated with PD-1/PD-L1 inhibitors**

|                                                           | aHR   | (95% CI)       | P-Value   |
|-----------------------------------------------------------|-------|----------------|-----------|
| VA vs. non-VA                                             | 0.451 | 0.282 - 0.720  | 0.0008*** |
| Age                                                       | 0.999 | 0.973 - 1.025  | 0.91      |
| Gender, female vs. male                                   | 0.625 | 0.372 - 1.052  | 0.08.     |
| BMI 25 – 29.9 kg/m <sup>2</sup> vs. <25 kg/m <sup>2</sup> | 0.614 | 0.369 - 1.022  | 0.06.     |
| BMI ≥30 kg/m <sup>2</sup> vs. <25 kg/m <sup>2</sup>       | 0.273 | 0.115 - 0.648  | 0.003 **  |
| ECOG status                                               | 1.399 | 1.126 - 1.738  | 0.002 **  |
| Smoker, current/past vs. never                            | 1.342 | 0.622 - 2.895  | 0.45      |
| Comorbidities, yes vs. no                                 | 0.418 | 0.246 - 0.710  | 0.0013 ** |
| Surgery, yes vs. non                                      | 0.792 | 0.369 - 1.702  | 0.55      |
| Stage IV UICC vs. stage III UICC                          | 0.723 | 0.312 - 1.676  | 0.45      |
| Brain radiation vs. no brain radiation                    | 1.302 | 0.704 - 2.408  | 0.40      |
| PD-L1 TPS 1-10%                                           | 0.766 | 0.418 - 1.403  | 0.38      |
| PD-L1 TPS 11-20%                                          | 1.102 | 0.394 - 3.085  | 0.85      |
| PD-L1 TPS 21-30%                                          | 0.822 | 0.341 - 1.979  | 0.66      |
| PD-L1 TPS 31-40%                                          | 0.618 | 0.180 - 2.123  | 0.44      |
| PD-L1 TPS 41-50%                                          | 6.001 | 1.301 - 27.684 | 0.022*    |
| PD-L1 TPS 51-60%                                          | 0.570 | 0.212 - 1.536  | 0.27      |

|                          |       |               |      |
|--------------------------|-------|---------------|------|
| <b>PD-L1 TPS 61-70%</b>  | 0.374 | 0.115 - 1.217 | 0.10 |
| <b>PD-L1 TPS 71-80%</b>  | 0.491 | 0.145 - 1.668 | 0.25 |
| <b>PD-L1 TPS 81-90%</b>  | 0.609 | 0.270 - 1.372 | 0.23 |
| <b>PD-L1 TPS 91-100%</b> | 0.718 | 0.149 - 3.448 | 0.68 |
| <b>EGFR, positive</b>    | 1.068 | 0.477 - 2.391 | 0.87 |

*Adjusted multivariate cox proportional analysis of association of add-on VA with adjusted hazard of death in advanced or metastasized NSCLC patients treated with PD-1/PD-L1 inhibitors, n=162; aHR, adjusted hazard ratio; VA, Viscum album L.; BMI, body mass index; PD-L1, programmed death-ligand 1; TPS, tumour proportion score; EGFR, epidermal growth factor receptor \*, p-value <0.05; \*\*, p-value <0.01; \*\*\*, p-value <0.001*
